# Supplementary material
Source: HighWire-hosted journal article supplement (https://www.annfammed.org/highwire/filestream/8226/field_highwire_adjunct_files/0/Fortin_Supp_App_1.pdf)
Supplement: Fortin_Supp_App_1.pdf [file Fortin_Supp_App_1.pdf]

**Online Supplementary Material**

Fortin M, Stewart M, Poitras M, Almirall J, Maddocks H. A systematic review of prevalence studies on multimorbidity: toward a more uniform methodology. *Ann Fam Med.* 2012;10(2):142-151.

<http://www.annfammed.org/content/10/2/142>

**Supplemental Appendix 1. Electronic Literature Search of the MEDLINE and MANTIS Databases (1980-2010)**

| Database | Step | Search Term                                                   |
|----------|------|---------------------------------------------------------------|
| MEDLINE  | 1    | <i>Multimorbidity or Multi-morbidity or Multiple diseases</i> |
| MANTIS   | 2    | <i>Prevalence<sup>a</sup></i>                                 |
|          | 3    | 1 and 2                                                       |
|          | 4    | <i>Comorbidity<sup>a</sup> or Co-morbidity</i>                |
|          | 5    | <i>Prevalence study<sup>a</sup></i>                           |
|          | 6    | 4 and 5                                                       |
|          | 7    | <i>Chronic disease<sup>a</sup></i>                            |
|          | 8    | <i>Primary health care<sup>a</sup></i>                        |
|          | 9    | <i>Family practice<sup>a</sup></i>                            |
|          | 10   | <i>General practice</i>                                       |
|          | 11   | <i>Population</i>                                             |
|          | 12   | 7 or 8 or 9 or 10 or 11                                       |
|          | 13   | 3 and 12                                                      |
|          | 14   | 6 and 12                                                      |
|          | 15   | 13 or 14                                                      |
|          | 16   | Remove duplicates from 15                                     |
|          | 17   | Limit 16 to English or French language                        |

<sup>a</sup> Indicates a Medical Subject Heading (MeSH). All other terms were used as key words.
